# Supplementary material for: Effects of chemical fungicides combined with plant resistance inducers against Bipolaris sorokiniana in turfgrass
Source: PeerJ. 2025 Feb 12;13:e18943. doi: 10.7717/peerj.18943 (PMC11829629; doi:10.7717/peerj.18943)
Supplement: Supplemental Information 1 [file peerj-13-18943-s001.xlsx]

## Sheet: Sheet1
	TABLE 4
REPEATS	TREATMENTS	% EFFECT
1	[Lactobacillus acidophilus-(Azoxystrobin+Difenocazole recommended dose)]	94.4
1		98.6
1		91.1
2	Azoxystrobin+Difenocazole recommended dose	91.1
2		94.4
2		92.2
3	Azoxystrobin+Difenocazole 1st subdose	90
3		94.4
3		88.8
4	[Lactobacillus acidophilus-(Azoxystrobin+Difenocazole 1st subdose)]	86.5
4		90
4		92
5	[Lactobacillus acidophilus-(Epoxiconazole+Pyraclostrobin recommended dose)]	83.3
5		88.8
5		94.4
6	[Arthrobacter sp.-(Epoxiconazole+Pyraclostrobin 1st subdose)]	92.8
6		85.6
6		87.7
7	[Arthrobacter sp.-(Azoxystrobin+Difenocazole recommended dose)]	85.5
7		88
7		90
8	Epoxiconazole+Pyraclostrobin recommended dose	90.7
8		83.3
8		88.8
9	[Harpin Protein-(Azoxystrobin+Difenocazole recommended dose	83.6
9		90
9		85
10	[Arthrobacter sp.-(Epoxiconazole+Pyraclostrobin recommended dose)]	77.7
10		85.7
10		94.8
11	[Lactobacillus acidophilus-(Azoxystrobin+Difenocazole 2nd subdose)]	87.5
11		82.6
11		85.2
12	[Arthrobacter sp.-(Azoxystrobin+Difenocazole 1st subdose)]	87.7
12		84.8
12		80
13	[Lactobacillus acidophilus-(Epoxiconazole+Pyraclostrobin 1st subdose)]	85.5
13		81.7
13		84.6
14	Epoxiconazole+Pyraclostrobin 1st subdose	83.3
14		89.79
14		77.5
15	[Harpin Protein-(Epoxiconazole+Pyraclostrobin recommended dose)]	79.5
15		84.5
15		83.6
16	Lactobacillus acidophilus	83.3
16		75.5
16		88.8
17	[Harpin Protein-(Azoxystrobin+Difenocazole 1st subdose)]	78
17		82.4
17		86.4
18	[Arthrobacter sp.-(Azoxystrobin+Difenocazole 2nd subdose)]	78.5
18		80.2
18		74.6
19	[Harpin Protein-(Azoxystrobin+Difenocazole 2nd subdose)]	76
19		82.5
19		72
20	[Arthrobacter sp.-(Epoxiconazole+Pyraclostrobin 2nd subdose)]	69.8
20		79.5
20		74.4
21	Azoxystrobin+Difenocazole 2nd subdose	82.2
21		72.2
21		68.8
22	[Harpin Protein-(Epoxiconazole+Pyraclostrobin 1st subdose)]	69.8
22		74.08
22		74.4
23	Harpin Protein	77.7
23		72.2
23		66.6
24	Epoxiconazole+Pyraclostrobin 2nd subdose	66.6
24		69.1
24		72.2
25	Arthrobacter sp.	66.6
25		61.1
25		72.2
26	[Lactobacillus acidophilus-(Epoxiconazole+Pyraclostrobin 2nd subdose)]	60
26		65.2
26		61.1
27	[Harpin Protein-(Epoxiconazole+Pyraclostrobin 2nd subdose)]	63.6
27		44.8
27		61
				Applications used in greenhouse trials against B. sorokiniana	% Effect
				[Lactobacillus acidophilus-(Azoxystrobin+Difenocazole recommended dose)]	94,70±3,76a*
				Azoxystrobin+Difenocazole recommended dose	92,57±1,68ab
				Azoxystrobin+Difenocazole 1st subdose	91,07±2,95abc
				[Lactobacillus acidophilus-(Azoxystrobin+Difenocazole 1st subdose)]	89,50±2,78abc
				[Lactobacillus acidophilus-(Epoxiconazole+Pyraclostrobin recommended dose)]	88,83±5,55abc
				[Arthrobacter sp.-(Epoxiconazole+Pyraclostrobin 1st subdose)]	88,70±3,70abc
				[Arthrobacter sp.-(Azoxystrobin+Difenocazole recommended dose)]	87,83±2,26abc
				Epoxiconazole+Pyraclostrobin recommended dose	87,60±3,84abc
				[Harpin Protein-(Azoxystrobin+Difenocazole recommended dose	86,20±3,37abcd
				[Arthrobacter sp.-(Epoxiconazole+Pyraclostrobin recommended dose)]	86,07±8,56abcd
				[Lactobacillus acidophilus-(Azoxystrobin+Difenocazole 2nd subdose)]	85,10±2,45bcde
				[Arthrobacter sp.-(Azoxystrobin+Difenocazole 1st subdose)]	84,17±3,89bcde
				[Lactobacillus acidophilus-(Epoxiconazole+Pyraclostrobin 1st subdose)]	83,93±1,99bcde
				Epoxiconazole+Pyraclostrobin 1st subdose	83,53±6,15bcde
				[Harpin Protein-(Epoxiconazole+Pyraclostrobin recommended dose)]	82,53±2,67cdef
				Lactobacillus acidophilus	82,53±6,68cdef
				[Harpin Protein-(Azoxystrobin+Difenocazole 1st subdose)]	82,27±4,20cdef
				[Arthrobacter sp.-(Azoxystrobin+Difenocazole 2nd subdose)]	77,77±2,87defg
				[Harpin Protein-(Azoxystrobin+Difenocazole 2nd subdose)]	76,83±5,30efg
				[Arthrobacter sp.-(Epoxiconazole+Pyraclostrobin 2nd subdose)]	74,57±4,85fgh
				Azoxystrobin+Difenocazole 2nd subdose	74,40±6,97fgh
				[Harpin Protein-(Epoxiconazole+Pyraclostrobin 1st subdose)]	72,76±2,57gh
				Harpin Protein	72,17±5,55gh
				Epoxiconazole+Pyraclostrobin 2nd subdose	69,30±2,81ghi
				Arthrobacter sp.	66,63±5,55hi
				[Lactobacillus acidophilus-(Epoxiconazole+Pyraclostrobin 2nd subdose)]	62,10±2,74ij
				[Harpin Protein-(Epoxiconazole+Pyraclostrobin 2nd subdose)]	56,47±10,19j
				P value	0.001
