# Supplementary material for: Effects of chemical fungicides combined with plant resistance inducers against Bipolaris sorokiniana in turfgrass
Source: PeerJ. 2025 Feb 12;13:e18943. doi: 10.7717/peerj.18943 (PMC11829629; doi:10.7717/peerj.18943)
Supplement: Supplemental Information 2 [file peerj-13-18943-s002.xlsx]

## Sheet: Sheet1
TABLE 5
LOCATION	APPLICATION	EFFECT VALUES				LOCATION	APPLICATION	MEAN±SD
ANKARA	1	96.6				ANK	1	93,27±4,02
ANKARA	1	94.4				ANK	2	89,90±2,99
ANKARA	1	88.8				P VALUE		0.31
ANKARA	2	92.16				ANT	1	95,00±2,92
ANKARA	2	86.5				ANT	2	91,17±2,87
ANKARA	2	91.04				P VALUE		0.18
ANTALYA	1	97.7
ANTALYA	1	95.4				*There are no significant differences between the two application in both of the two provinces separately (P>0.05)
ANTALYA	1	91.9
ANTALYA	2	94.2
ANTALYA	2	90.8
ANTALYA	2	88.5
